# Supplementary material for: Soluble prefusion-closed HIV-envelope trimers with glycan-covered bases
Source: PubMed Central journal article supplement (PMC10404741; doi:10.1016/j.isci.2023.107403), 2023-07-15
Supplement: mmc1.pdf [file mmc1.pdf]

## **Supplemental information**

### **Soluble prefusion-closed HIV-envelope**

#### **trimers with glycan-covered bases**

**Adam S. Olia, Cheng Cheng, Tongqing Zhou, Andrea Biju, Darcy R. Harris, Anita Changela, Hongying Duan, Vera B. Ivleva, Wing-Pui Kong, Li Ou, Reda Rawi, Yaroslav Tsybovsky, David J. Van Wazer, Angela R. Corrigan, Christopher A. Gonelli, Myungjin Lee, Krisha McKee, Sandeep Narpala, Sijy O'Dell, Danealle K. Parchment, Erik-Stephane D. Stancofski, Tyler Stephens, Ivy Tan, I-Ting Teng, Shuishu Wang, Qing Wei, Yongping Yang, Zhengrong Yang, Baoshan Zhang, VRC Production Program, Jan Novak, Matthew B. Renfrow, Nicole A. Doria-Rose, Richard A. Koup, Adrian B. McDermott, Jason G. Gall, Q. Paula Lei, John R. Mascola, and Peter D. Kwong**

**Table S1. Antigenic screening of base-covered trimer designs, related to Figure 1. (A) Original high-throughput ELISA data. Color scale ranges from white (lowest value) to red (highest value). (B) ELISA raw data values normalized by the reference strain BG505-RnS(7MutV1)-2G-3mut-DS\_SOSIP. We consider a trimer to be in the prefusion-closed conformation if either VRC26.25, PG1145, or PGDM1400 binding is greater 0.75.**

**A**

| Trimer Construct                                    | VRC26.25 | PG1145   | PGDM1400 | PGT151 | 35022  | VRC34  | PGT122 | N6     | 3BNC117 | F105   | 447-52D | 17b    | 17b-CD4 | 1E6    | 5H3    | 3H2    | 989    | RM20A3 |
|-----------------------------------------------------|----------|----------|----------|--------|--------|--------|--------|--------|---------|--------|---------|--------|---------|--------|--------|--------|--------|--------|
| BG505-RnS(7MutV1)-2G-3mut-DS_SOSIP-scFc             | 0.7097   | 0.6834   | 0.9852   | 1.2956 | 1.0098 | 0.783  | 1.0493 | 0.811  | 1.0396  | 1.1344 | 0.5004  | 0.0844 | 0.0858  | 3.013  | 2.8426 | 3.0678 | 0.1953 | 2.6452 |
| BG505-RnS(7MutV1)-2G-3mut-DS_SOSIP-502-660-NxT-scFc | 0.6698   | 0.5903   | 1.1126   | 0.8404 | 0.9137 | 0.5669 | 1.0211 | 0.8165 | 1.0522  | 1.1949 | 1.3055  | 0.2111 | 0.0719  | 1.9949 | 1.3055 | 0.2111 | 0.1094 | 2.0276 |
| BG505-DSSOSIP (non-scFc)                            | 0.2128   | 0.1514   | 0.3322   | 1.1526 | 0.296  | 0.4572 | 0.3242 | 0.5538 | 0.6036  | 1.288  | 0.464   | 0.0513 | 0.052   | 1.7076 | 1.6523 | 1.6086 | 0.4052 | 1.4786 |
| BG505-RnS7MutN28-502-660                            | 0.5948   | 0.393    | 1.0888   | 0.5863 | 0.8204 | 0.4681 | 0.8009 | 0.7076 | 0.8509  | 1.0188 | 0.4727  | 0.0728 | 0.0703  | 1.3954 | 0.6765 | 0.143  | 0.1629 | 1.156  |
| BG505-RnS7MutN28-JCBv2-660                          | 0.5272   | 0.508    | 1.0459   | 0.9529 | 0.7687 | 0.4609 | 0.8615 | 0.7172 | 0.8376  | 1.0129 | 0.4661  | 0.0778 | 0.0688  | 0.6948 | 0.3487 | 0.123  | 0.1146 | 1.0426 |
| BG505-RnS7MutN28-502-660-665                        | 0.5547   | 0.531    | 0.9816   | 0.5018 | 0.7854 | 0.4367 | 0.8638 | 0.6656 | 0.8413  | 1.0162 | 0.4534  | 0.0697 | 0.0668  | 0.5019 | 0.2292 | 0.1062 | 0.1    | 0.6078 |
| BG505-RnS7MutN28-JCBv1-660                          | 0.6878   | 0.521    | 0.9719   | 0.784  | 0.9439 | 0.7315 | 0.8651 | 0.7033 | 0.9533  | 1.0119 | 0.4163  | 0.0716 | 0.0699  | 1.0194 | 0.6564 | 0.9006 | 0.1063 | 2.688  |
| BG505-RnS7MutN28-JCBv2-660                          | 0.5914   | 0.3345   | 1.03     | 0.7853 | 0.7394 | 0.605  | 0.8946 | 0.7067 | 0.9769  | 1.203  | 0.4631  | 0.0828 | 0.0881  | 0.3602 | 0.7243 | 0.1258 | 0.1159 | 1.4536 |
| BG505-RnS7MutN28-JCBv3-660                          | 0.5882   | 0.2786   | 0.9981   | 0.5759 | 0.7495 | 0.6638 | 0.8742 | 0.6668 | 0.9391  | 1.1239 | 0.4478  | 0.0695 | 0.076   | 0.3509 | 0.4952 | 0.1229 | 0.1204 | 1.0324 |
| BG505-RnS7MutN28-JCBv1-660                          | 0.7449   | 0.6327   | 0.9999   | 0.6327 | 0.8412 | 0.726  | 0.8993 | 0.7154 | 0.9165  | 1.1108 | 0.4409  | 0.0748 | 0.0707  | 2.1004 | 2.6831 | 0.8311 | 0.1153 | 2.7296 |
| BG505-RnS7MutN28-JCBv2-660                          | 0.6286   | 0.2708   | 1.0573   | 0.4196 | 0.7241 | 0.6901 | 0.8906 | 0.7759 | 0.9536  | 1.3105 | 0.4751  | 0.1091 | 0.0929  | 0.2692 | 0.3307 | 0.1107 | 0.1175 | 0.6388 |
| BG505-RnS7MutN28-JCBv3-660                          | 0.7543   | 0.4267   | 1.0882   | 0.428  | 0.7281 | 0.6479 | 0.9601 | 0.7172 | 1.0124  | 1.1962 | 0.505   | 0.0732 | 0.0876  | 0.2594 | 0.3061 | 0.1105 | 0.1459 | 0.8193 |
| BG505-RnS7MutN28-JCBv1-660-665                      | 0.6711   | 0.4485   | 1.0172   | 0.6906 | 0.9306 | 0.747  | 0.7197 | 0.7396 | 0.936   | 1.1105 | 0.469   | 0.0699 | 0.0882  | 0.9773 | 1.8077 | 0.2431 | 0.1178 | 2.0142 |
| BG505-RnS7MutN28-JCBv2-660-665                      | 0.1354   | 0.1982   | 0.9484   | 0.2104 | 0.2585 | 0.2135 | 0.2454 | 0.6594 | 0.7344  | 0.0866 | 0.4569  | 0.0679 | 0.0767  | 0.0958 | 0.3004 | 0.784  | 0.0846 | 0.396  |
| BG505-RnS7MutN28-JCBv3-660-665                      | 0.5267   | 0.2007   | 1.0799   | 0.3515 | 0.6331 | 0.6907 | 0.8136 | 0.8107 | 0.9648  | 1.1276 | 0.477   | 0.07   | 0.066   | 0.1835 | 0.1102 | 0.0997 | 0.1021 | 0.2524 |
| BG505-RnS7MutN28-JCBv1-660-665                      | 0.7183   | 1.0318   | 0.9555   | 0.9673 | 0.8729 | 0.7556 | 1.0305 | 0.7257 | 0.8793  | 1.0189 | 0.4342  | 0.074  | 0.0668  | 1.2531 | 2.4027 | 3.2513 | 1.0854 | 2.7193 |
| BG505-RnS7MutN28-JCBv2-660-665                      | 0.5437   | 0.276    | 1.0263   | 0.3824 | 0.6279 | 0.7288 | 1.005  | 0.8161 | 0.9521  | 1.407  | 0.4751  | 0.0715 | 0.0681  | 0.1913 | 0.1187 | 0.1024 | 0.1011 | 0.2581 |
| BG505-RnS7MutN28-JCBv3-660-665                      | 0.564    | 0.2189   | 1.0688   | 0.2939 | 0.6323 | 0.6824 | 0.8744 | 0.7951 | 0.9812  | 1.1567 | 0.4775  | 0.0701 | 0.0659  | 0.158  | 0.0949 | 0.1024 | 0.0977 | 0.2012 |
| BG505-DSSOSIP-N332-RnS7Mut-502-660                  | 0.5186   | 0.3331   | 0.9985   | 0.8651 | 0.8035 | 0.4597 | 0.8017 | 0.6875 | 0.8468  | 1.0257 | 0.4613  | 0.1153 | 0.0668  | 1.6257 | 0.9672 | 0.1703 | 0.1053 | 1.6221 |
| scFc-3C-6931-502-660                                | 0.7697   | 0.6993   | 0.502    | 0.465  | 0.8538 | 0.738  | 1.3564 | 0.8889 | 1.0564  | 0.311  | 0.3629  | 0.0637 | 0.2196  | 0.1526 | 0.0731 | 0.1129 | 0.1114 | 0.0766 |
| scFc-3C-6931-DS-502-660                             | 0.6966   | 0.5988   | 0.5125   | 0.3859 | 0.7938 | 0.6726 | 1.2645 | 0.7923 | 0.9698  | 0.3036 | 0.3904  | 0.0641 | 0.0637  | 0.1429 | 0.0842 | 0.1026 | 0.1043 | 0.0755 |
| scFc-3C-6931-28-502-660                             | 0.4774   | 1.2607   | 0.3632   | 0.8113 | 0.68   | 0.8345 | 1.1005 | 0.9527 | 0.7035  | 0.3625 | 0.2506  | 0.0723 | 0.3282  | 0.2895 | 0.0943 | 0.0934 | 0.1136 | 0.0848 |
| scFc-3C-6931-28-JCBv1-660                           | 0.116    | 0.057    | 0.8343   | 0.5227 | 0.2907 | 0.75   | 1.4531 | 0.856  | 1.1255  | 0.4913 | 0.465   | 0.094  | 0.3054  | 0.4816 | 0.0814 | 0.085  | 0.1187 | 0.088  |
| scFc-3C-6931-28-502-660-665                         | 0.9052   | 1.7704   | 0.824    | 0.5161 | 0.9075 | 0.8133 | 1.5308 | 0.9494 | 1.1625  | 0.106  | 0.44    | 0.082  | 0.3877  | 0.1418 | 0.0952 | 0.1124 | 0.1381 | 0.0923 |
| scFc-3C-6931-JCBv4V1-660                            | 0.9524   | 1.2986   | 0.7995   | 0.6959 | 1.0953 | 1.0574 | 1.4368 | 0.9716 | 1.1739  | 0.3626 | 0.4426  | 0.0764 | 0.2371  | 0.1508 | 0.0857 | 0.1262 | 0.1088 | 0.831  |
| scFc-3C-6931-JCBv4V2-660                            | 0.8474   | 0.9306   | 0.7377   | 0.9122 | 0.9467 | 0.9947 | 1.4316 | 0.9781 | 1.1563  | 0.4077 | 0.4549  | 0.0877 | 0.3433  | 0.1525 | 0.0879 | 0.1569 | 0.1143 | 0.8006 |
| scFc-3C-6931-JCBv4V3-660                            | 0.845    | 1.0386   | 0.8166   | 0.8023 | 0.9057 | 0.984  | 1.4554 | 1.0396 | 1.1858  | 0.4802 | 0.4681  | 0.1221 | 0.3174  | 0.1743 | 0.0811 | 0.1192 | 0.1022 | 0.8006 |
| scFc-3C-6931-28-JCBv4V1-660                         | 1.0692   | 1.5232   | 0.8676   | 0.7782 | 1.0882 | 1.0422 | 1.4258 | 0.9507 | 1.1363  | 0.3353 | 0.3784  | 0.0787 | 0.1917  | 0.1752 | 0.0883 | 0.1099 | 0.1528 | 0.086  |
| scFc-3C-6931-28-JCBv4V2-660                         | 0.806    | 0.9723   | 0.7066   | 0.7629 | 0.8735 | 1.0008 | 1.4242 | 0.9792 | 1.1305  | 0.3967 | 0.4054  | 0.0781 | 0.3054  | 0.1585 | 0.0814 | 0.085  | 0.1187 | 0.0842 |
| scFc-3C-6931-28-JCBv4V3-660                         | 0.855    | 0.8257   | 0.7575   | 0.8527 | 0.859  | 0.9714 | 1.4531 | 0.9317 | 1.1679  | 0.412  | 0.383   | 0.0781 | 0.3959  | 0.1559 | 0.0749 | 0.1116 | 0.1074 | 0.0739 |
| scFc-3C-6931-JCBv4V1-660-665                        | 0.908    | 1.3799   | 0.8096   | 1.3173 | 0.9663 | 0.9744 | 1.4047 | 0.9127 | 1.1648  | 0.3975 | 0.4353  | 0.1078 | 0.2654  | 0.1398 | 0.0788 | 0.1096 | 0.1253 | 0.0794 |
| scFc-3C-6931-JCBv4V2-660-665                        | 0.6743   | 0.6982   | 0.7076   | 0.7349 | 0.827  | 0.8605 | 1.4582 | 0.9489 | 1.1616  | 0.4747 | 0.4623  | 0.0753 | 0.4504  | 0.1548 | 0.0752 | 0.1129 | 0.1124 | 0.0788 |
| scFc-3C-6931-JCBv4V3-660-665                        | 0.6345   | 0.6578   | 0.7871   | 0.5087 | 0.7383 | 0.846  | 1.3991 | 1.0211 | 1.2297  | 0.473  | 0.4644  | 0.0743 | 0.4278  | 0.1493 | 0.0752 | 0.1128 | 0.1339 | 0.0923 |
| scFc-3C-6931-28-JCBv4V1-660-665                     | 0.9788   | 1.7291   | 0.7754   | 1.5497 | 0.9683 | 0.9497 | 1.4591 | 0.919  | 1.1807  | 0.32   | 0.3951  | 0.0737 | 0.2384  | 0.1531 | 0.0865 | 0.1253 | 0.1321 | 0.0895 |
| scFc-3C-6931-28-JCBv4V2-660-665                     | 0.5881   | 0.4141   | 0.4386   | 0.3994 | 0.6837 | 0.7607 | 1.343  | 0.9255 | 1.1841  | 0.3082 | 0.3287  | 0.0938 | 0.4293  | 0.1556 | 0.0723 | 0.087  | 0.1145 | 0.0798 |
| scFc-3C-6931-28-JCBv4V3-660-665                     | 0.5106   | 0.334    | 0.5233   | 0.312  | 0.6152 | 0.8282 | 1.3411 | 0.9903 | 1.1907  | 0.4025 | 0.3583  | 0.0871 | 0.4885  | 0.1415 | 0.0732 | 0.0777 | 0.1086 | 0.8971 |
| scFc-3C-6931-DS-28-502-660                          | 0.9518   | 1.2915   | 0.8805   | 0.6124 | 0.9488 | 0.8195 | 1.452  | 0.9204 | 1.0959  | 0.375  | 0.4862  | 0.0758 | 0.0724  | 0.1606 | 0.1332 | 0.1264 | 0.1313 | 0.8859 |
| scFc-3C-6931-DS-502-660-665                         | 0.788    | 0.7999   | 0.8094   | 0.4164 | 0.9312 | 0.6847 | 1.3427 | 0.9238 | 1.0384  | 0.3906 | 0.5016  | 0.0754 | 0.0684  | 0.1449 | 0.0812 | 0.1136 | 0.1118 | 0.0747 |
| scFc-3C-6931-DS-28-502-660-665                      | 0.8741   | 0.9377   | 0.8806   | 0.4116 | 0.9158 | 0.7177 | 1.3601 | 0.8761 | 1.0321  | 0.337  | 0.4179  | 0.0731 | 0.0699  | 0.1406 | 0.0788 | 0.1033 | 0.1014 | 0.0753 |
| scFc-3C-6931-DS-JCBv4V1-660                         | 0.8053   | 0.6727   | 0.5861   | 1.7975 | 0.9671 | 0.8951 | 1.243  | 0.7811 | 0.9504  | 0.2849 | 0.3701  | 0.0682 | 0.0651  | 0.1881 | 0.0811 | 0.1145 | 0.0968 | 0.0725 |
| scFc-3C-6931-DS-JCBv4V2-660                         | 0.7453   | 0.5732   | 0.4356   | 0.4585 | 0.848  | 0.8958 | 1.3883 | 0.9466 | 1.1421  | 0.4574 | 0.4574  | 0.0719 | 0.0681  | 0.1665 | 0.1152 | 0.1553 | 0.1889 | 0.0858 |
| scFc-3C-6931-DS-JCBv4V3-660                         | 0.6182   | 0.5086   | 0.4959   | 0.3458 | 0.8476 | 0.7919 | 1.699  | 0.8103 | 0.9775  | 0.3042 | 0.3498  | 0.0752 | 0.0827  | 0.1453 | 0.0668 | 0.1053 | 0.0889 | 0.0658 |
| scFc-3C-6931-DS-28-JCBv4V1-660                      | 0.9052   | 1.2647   | 0.8457   | 0.6332 | 0.9222 | 0.9677 | 1.4341 | 0.8805 | 1.1198  | 0.3622 | 0.4287  | 0.0672 | 0.0691  | 0.1464 | 0.0834 | 0.1238 | 0.1514 | 0.08   |
| scFc-3C-6931-DS-28-JCBv4V2-660                      | 0.9794   | 1.2584   | 0.8607   | 0.5043 | 0.9002 | 0.8896 | 1.4298 | 0.9181 | 1.1328  | 0.4322 | 0.4611  | 0.0742 | 0.0699  | 0.1649 | 0.0716 | 0.1185 | 0.1162 | 0.0805 |
| scFc-3C-6931-DS-28-JCBv4V3-660                      | 0.8376   | 1.0525   | 0.7265   | 0.7834 | 0.9411 | 0.9287 | 1.3936 | 0.867  | 0.9938  | 0.4003 | 0.4349  | 0.07   | 0.0592  | 0.146  | 0.0685 | 0.1136 | 0.1155 | 0.816  |
| scFc-3C-6931-DS-JCBv4V2-660-665                     | 0.7509   | 0.9481   | 0.8203   | 0.5039 | 0.8217 | 0.8436 | 1.3883 | 0.9446 | 1.1421  | 0.4741 | 0.5293  | 0.0719 | 0.0699  | 0.1522 | 0.0843 | 0.1154 | 0.1202 | 0.0788 |
| scFc-3C-6931-DS-JCBv4V3-660-665                     | 0.88578  | 0.8378   | 0.8729   | 0.8356 | 0.4337 | 0.7688 | 1.0767 | 0.8856 | 1.149   | 0.4574 | 0.4574  | 0.0719 | 0.0681  | 0.139  | 0.0739 | 0.1152 | 0.1553 | 0.0838 |
| scFc-3C-6931-DS-28-JCBv4V1-660-665                  | 0.945611 | 0.656277 | 1.032481 | 1.3881 | 0.8803 | 0.9803 | 1.0205 | 0.9484 | 1.1054  | 0.4205 | 0.468   | 0.0775 | 0.0711  | 0.1505 |        |        |        |        |

**Table S2. Cryo-EM data collection, processing, and model refinement statistics for the glycan-base ConC structure, related to Figure 4.**

| Glycan-base ConC                                |                     |
|-------------------------------------------------|---------------------|
| <b>EMDB ID</b>                                  | EMD-28910           |
| <b>PDB ID</b>                                   | 8F7T                |
| <u>Data Collection</u>                          |                     |
| Microscope                                      | FEI Titan Krios     |
| Voltage (kV)                                    | 300                 |
| Electron dose (e <sup>-</sup> /Å <sup>2</sup> ) | 43.54               |
| Detector                                        | Gatan K3 BioQuantum |
| Pixel Size (Å)                                  | 0.415 / 0.830       |
| Defocus Range (µm)                              | -0.7 / -2.0         |
| Magnification                                   | 105,000             |
| <br>                                            |                     |
| <u>Reconstruction</u>                           |                     |
| Software                                        | cryoSPARC v3.3.1    |
| Particles                                       | 12,967              |
| Symmetry                                        | C3                  |
| Box size (pix)                                  | 256                 |
| Resolution (Å) (FSC <sub>0.143</sub> )          | 4.10                |
| <br>                                            |                     |
| <u>Refinement</u>                               |                     |
| Software                                        | Phenix 1.20         |
| Protein residues                                | 1641                |
| Chimera CC                                      | 0.77                |
| EMRinger Score                                  | 1.86                |
| R.m.s. deviations                               |                     |
| Bond lengths (Å)                                | 0.005               |
| Bond angles (°)                                 | 0.746               |
| <br>                                            |                     |
| <u>Validation</u>                               |                     |
| Molprobit score                                 | 2.26                |
| Clash score                                     | 14.5                |
| Favored rotamers (%)                            | 99.1                |
| Ramachandran                                    |                     |
| Favored regions (%)                             | 89.1                |
| Allowed regions (%)                             | 10.5                |
| Disallowed regions (%)                          | 0.4                 |



**Table S4. Background-corrected ELISA data, related to Figures 6 and 7, and Figure S5.**

|                         |        | Mouse 341 (Protein-base BG505 immunized) |          |          |          |          |          |          |          |          |           | Mouse 342 (Glycan-base BG505 immunized) |          |          |          |          |          |          |          |          |           |        |
|-------------------------|--------|------------------------------------------|----------|----------|----------|----------|----------|----------|----------|----------|-----------|-----------------------------------------|----------|----------|----------|----------|----------|----------|----------|----------|-----------|--------|
| Dilution factor         |        | E01                                      | E02      | E03      | E04      | E05      | E06      | E07      | E08      | E09      | E10       | E11                                     | E12      | E13      | E14      | E15      | E16      | E17      | E18      | E19      | E20       |        |
| anti-Protein base BG505 | Week 8 | 100                                      | 2.613    | 2.655    | 2.590    | 1.835    | 1.891    | 2.917    | 2.626    | 2.620    | 2.353     | 2.347                                   | 0.351    | 0.342    | -0.005   | 0.004    | 0.013    | 0.25     | 0.68     | 0.28     | -0.05     | 0.09   |
|                         |        | 500                                      | 2.546    | 1.672    | 2.517    | 2.284    | 1.681    | 2.913    | 2.434    | 2.238    | 2.496     | 2.158                                   | -0.020   | -0.052   | -0.048   | -0.059   | -0.061   | -0.06    | -0.08    | -0.07    | -0.11     | -0.07  |
|                         |        | 2,500                                    | 2.011    | 2.279    | 1.292    | 1.569    | 1.087    | 2.712    | 2.617    | 1.786    | 2.072     | 1.991                                   | -0.052   | -0.070   | -0.078   | -0.071   | -0.078   | -0.03    | -0.12    | -0.11    | -0.12     | -0.12  |
|                         |        | 12,500                                   | 1.203    | 1.652    | 0.574    | 0.313    | 0.579    | 2.107    | 1.729    | 0.723    | 0.964     | 1.087                                   | -0.036   | -0.074   | -0.077   | -0.081   | -0.078   | -0.06    | -0.12    | -0.13    | -0.13     | -0.13  |
|                         |        | 62,500                                   | 0.420    | 0.256    | 0.160    | 0.058    | 0.137    | 1.130    | 0.687    | 0.259    | 0.384     | 0.431                                   | 0.001    | -0.077   | -0.077   | -0.079   | -0.080   | -0.07    | -0.12    | -0.13    | -0.13     | -0.13  |
|                         |        | 312,500                                  | 0.105    | 0.045    | 0.007    | 0.002    | 0.009    | 0.550    | 0.245    | 0.053    | 0.086     | 0.083                                   | -0.044   | -0.080   | -0.082   | -0.072   | -0.083   | -0.05    | -0.12    | -0.12    | -0.13     | -0.13  |
| 1,562,500               | -0.014 | 0.001                                    | -0.009   | -0.027   | -0.020   | 0.352    | 0.072    | -0.016   | -0.002   | 0.004    | -0.038    | -0.062                                  | -0.071   | -0.077   | -0.071   | -0.01    | -0.09    | -0.12    | -0.11    | -0.12    |           |        |
| anti-Glycan base BG505  | Week 8 | 100                                      | 0.04     | 0.13     | 0.08     | 0.12     | 0.04     | 0.47     | 0.28     | 0.07     | 0.07      | 0.34                                    | 1.08     | 1.17     | 1.39     | 1.36     | 0.95     | 1.49     | 1.24     | 1.40     | 1.34      | 0.98   |
|                         |        | 500                                      | -0.02    | 0.02     | -0.02    | 0.00     | -0.02    | 0.09     | 0.11     | 0.00     | -0.01     | 0.14                                    | 0.76     | 0.68     | 0.58     | 0.77     | 1.14     | 0.78     | 0.86     | 1.05     | 0.86      | 0.80   |
|                         |        | 2,500                                    | -0.03    | -0.03    | -0.03    | -0.03    | -0.03    | 0.02     | 0.06     | -0.02    | -0.02     | 0.08                                    | 0.43     | 0.24     | 0.19     | 0.30     | 0.59     | 0.27     | 0.39     | 0.43     | 0.34      | 0.30   |
|                         |        | 12,500                                   | -0.04    | -0.03    | -0.04    | -0.04    | -0.04    | 0.02     | -0.02    | -0.03    | -0.03     | 0.00                                    | 0.09     | 0.02     | 0.00     | 0.04     | 0.18     | 0.05     | 0.08     | 0.10     | 0.06      | 0.04   |
|                         |        | 62,500                                   | -0.04    | -0.03    | -0.03    | -0.03    | -0.04    | -0.02    | -0.01    | -0.02    | -0.02     | -0.02                                   | -0.02    | -0.04    | -0.03    | -0.03    | 0.01     | -0.02    | -0.01    | 0.00     | -0.01     | -0.01  |
|                         |        | 312,500                                  | -0.04    | -0.04    | -0.04    | -0.04    | -0.04    | -0.02    | -0.02    | -0.03    | -0.02     | -0.03                                   | -0.05    | -0.05    | -0.05    | -0.05    | -0.04    | -0.03    | -0.03    | -0.03    | -0.02     | -0.02  |
| 1,562,500               | -0.04  | -0.04                                    | -0.04    | -0.04    | -0.03    | -0.02    | -0.03    | -0.03    | -0.03    | -0.03    | -0.05     | -0.05                                   | -0.05    | -0.04    | -0.05    | -0.03    | -0.03    | -0.03    | -0.02    | -0.03    |           |        |
|                         |        | Mouse 343 (Protein-base ConC immunized)  |          |          |          |          |          |          |          |          |           | Mouse 344 (Glycan-base ConC immunized)  |          |          |          |          |          |          |          |          |           |        |
| Dilution factor         |        | E21                                      | E22      | E23      | E24      | E25      | E26      | E27      | E28      | E29      | E30       | E31                                     | E32      | E33      | E34      | E35      | E36      | E37      | E38      | E39      | E40       |        |
| anti-Protein base ConC  | Week 8 | 100                                      | 1.732    | 1.772    | 2.133    | 1.713    | 1.985    | 2.039    | 1.997    | 1.989    | 1.888     | 1.819                                   | 0.831    | 0.931    | 0.214    | 0.640    | 0.224    | 0.22     | 0.17     | 0.49     | 0.10      | 0.12   |
|                         |        | 500                                      | 1.910    | 1.647    | 2.150    | 1.895    | 2.048    | 2.065    | 1.535    | 2.018    | 1.956     | 1.595                                   | 0.677    | 0.288    | 0.009    | 0.253    | 0.003    | 0.01     | 0.03     | 0.11     | -0.01     | -0.02  |
|                         |        | 2,500                                    | 0.979    | 1.008    | 1.864    | 1.772    | 1.629    | 1.838    | 1.016    | 1.789    | 1.416     | 0.988                                   | 0.036    | 0.097    | -0.001   | 0.077    | -0.019   | -0.04    | -0.03    | -0.03    | -0.06     | -0.06  |
|                         |        | 12,500                                   | 0.341    | 0.345    | 1.377    | 1.282    | 1.050    | 1.396    | 0.344    | 1.515    | 0.636     | 0.309                                   | -0.022   | 0.001    | -0.035   | -0.017   | -0.038   | -0.03    | -0.06    | -0.06    | -0.07     | -0.07  |
|                         |        | 62,500                                   | 0.064    | 0.047    | 0.548    | 0.474    | 0.382    | 0.476    | 0.054    | 0.749    | 0.144     | 0.047                                   | 0.017    | -0.031   | -0.031   | -0.031   | -0.038   | -0.05    | -0.07    | -0.07    | -0.07     | -0.07  |
|                         |        | 312,500                                  | 0.049    | -0.015   | 0.111    | 0.095    | 0.063    | 0.138    | -0.035   | 0.228    | -0.040    | -0.039                                  | -0.039   | -0.040   | -0.036   | -0.043   | -0.043   | -0.05    | -0.07    | -0.07    | -0.07     | -0.08  |
| 1,562,500               | 0.001  | 0.000                                    | 0.006    | 0.002    | -0.004   | 0.006    | -0.051   | 0.058    | -0.046   | -0.054   | -0.001    | -0.032                                  | -0.035   | -0.039   | -0.040   | -0.06    | -0.07    | -0.07    | -0.07    | -0.07    |           |        |
| anti-Glycan base ConC   | Week 8 | 100                                      | 0.27     | 0.05     | 0.17     | 0.04     | 0.02     | 0.03     | 0.74     | -0.03    | -0.02     | 0.02                                    | 0.95     | 1.64     | 1.24     | 2.45     | 1.10     | 1.00     | 1.22     | 1.15     | 1.28      | 0.74   |
|                         |        | 500                                      | 0.07     | -0.01    | 0.07     | 0.00     | -0.01    | -0.04    | 0.00     | -0.05    | -0.05     | -0.04                                   | 0.54     | 1.17     | 0.87     | 1.75     | 0.63     | 0.76     | 1.02     | 0.87     | 0.80      | 0.45   |
|                         |        | 2,500                                    | 0.01     | -0.01    | 0.01     | -0.01    | -0.01    | -0.05    | -0.04    | -0.05    | -0.05     | -0.05                                   | 0.25     | 0.56     | 0.47     | 0.95     | 0.20     | 0.31     | 0.49     | 0.35     | 0.39      | 0.17   |
|                         |        | 12,500                                   | -0.01    | -0.01    | -0.01    | -0.01    | -0.01    | -0.05    | -0.05    | -0.05    | -0.05     | -0.05                                   | 0.07     | 0.17     | 0.15     | 0.33     | 0.04     | 0.10     | 0.15     | 0.09     | 0.12      | 0.03   |
|                         |        | 62,500                                   | 0.00     | -0.01    | -0.01    | -0.01    | -0.01    | -0.05    | -0.05    | -0.05    | -0.05     | -0.05                                   | 0.01     | 0.04     | 0.04     | 0.08     | 0.00     | 0.02     | 0.03     | 0.02     | 0.03      | 0.00   |
|                         |        | 312,500                                  | -0.01    | -0.01    | -0.01    | -0.02    | -0.01    | -0.05    | -0.05    | -0.05    | -0.05     | -0.05                                   | 0.00     | 0.01     | 0.00     | 0.01     | -0.01    | 0.00     | 0.00     | -0.01    | 0.00      | 0.00   |
| 1,562,500               | -0.01  | 0.00                                     | 0.00     | 0.01     | -0.01    | -0.04    | -0.05    | -0.04    | -0.04    | -0.04    | -0.01     | -0.01                                   | -0.01    | -0.01    | 0.00     | -0.01    | -0.01    | -0.01    | -0.01    | -0.01    |           |        |
|                         |        | GP2108 (Protein-base BG505 immunized)    |          |          |          |          |          |          |          |          |           | GP2109 (Glycan-base BG505 immunized)    |          |          |          |          |          |          |          |          |           |        |
| Dilution factor         |        | GP2108-1                                 | GP2108-2 | GP2108-3 | GP2108-4 | GP2108-5 | GP2108-6 | GP2108-7 | GP2108-8 | GP2108-9 | GP2108-10 | GP2109-1                                | GP2109-2 | GP2109-3 | GP2109-4 | GP2109-5 | GP2109-6 | GP2109-7 | GP2109-8 | GP2109-9 | GP2109-10 |        |
| anti-Protein base BG505 | Week 6 | 1,000                                    | 3.295    | 3.193    | 1.464    | 2.021    | 1.799    | 3.436    | 3.406    | 3.435    | 3.424     | 3.359                                   | 0.515    | 0.518    | -0.054   | 0.991    | 0.033    | 0.32     | 0.99     | 0.49     | 0.89      | 0.39   |
|                         |        | 5,000                                    | 3.165    | 2.822    | 0.270    | 0.993    | 0.523    | 3.443    | 3.409    | 3.352    | 3.387     | 3.335                                   | 0.142    | -0.007   | -0.128   | 0.231    | -0.102   | 0.09     | 0.24     | 0.29     | 0.36      | 0.08   |
|                         |        | 25,000                                   | 1.988    | 1.057    | 0.275    | 0.311    | 0.175    | 2.977    | 2.413    | 2.749    | 2.767     | 2.238                                   | 0.141    | -0.103   | -0.138   | -0.060   | -0.117   | 0.04     | 0.03     | 0.01     | 0.06      | 0.02   |
|                         |        | 125,000                                  | 0.618    | 0.106    | 0.041    | -0.012   | 0.018    | 1.393    | 0.789    | 1.070    | 1.342     | 0.699                                   | 0.041    | -0.128   | -0.145   | -0.113   | -0.141   | 0.00     | -0.03    | -0.04    | -0.03     | -0.02  |
|                         |        | 625,000                                  | 0.144    | -0.024   | -0.043   | -0.039   | -0.035   | 0.516    | 0.193    | 0.274    | 0.422     | 0.188                                   | -0.137   | -0.123   | -0.146   | -0.136   | -0.143   | -0.01    | 0.09     | -0.04    | -0.05     | -0.04  |
|                         |        | 3,125,000                                | 0.052    | -0.043   | -0.046   | -0.050   | -0.047   | 0.200    | 0.066    | 0.075    | 0.123     | 0.041                                   | -0.135   | -0.112   | -0.146   | -0.144   | -0.139   | 0.00     | -0.04    | -0.05    | -0.05     | -0.05  |
| 15,625,000              | 0.048  | -0.036                                   | -0.033   | -0.047   | -0.040   | 0.214    | -0.016   | 0.017    | 0.008    | -0.014   | -0.106    | -0.049                                  | -0.113   | -0.135   | -0.129   | 0.06     | -0.02    | -0.03    | -0.04    | -0.03    |           |        |
| anti-Glycan base BG505  | Week 6 | 1,000                                    | 0.08     | 0.18     | 0.30     | 0.35     | 0.48     | 0.43     | 0.09     | 0.37     | 0.28      | 0.67                                    | 2.58     | 3.04     | 1.28     | 2.51     | 2.54     | 2.53     | 3.26     | 2.59     | 3.12      | 3.26   |
|                         |        | 5,000                                    | -0.07    | -0.04    | -0.02    | -0.04    | 0.02     | 0.10     | -0.01    | 0.09     | 0.07      | 0.29                                    | 1.75     | 2.83     | 0.71     | 2.29     | 1.23     | 1.73     | 2.80     | 2.43     | 2.89      | 2.33   |
|                         |        | 25,000                                   | -0.07    | -0.07    | -0.05    | -0.03    | -0.02    | -0.01    | -0.04    | -0.02    | -0.02     | 0.01                                    | 0.55     | 1.30     | 0.30     | 0.83     | 0.32     | 0.55     | 0.98     | 1.08     | 1.14      | 0.64   |
|                         |        | 125,000                                  | -0.07    | -0.06    | -0.06    | -0.07    | -0.04    | -0.03    | -0.04    | -0.04    | -0.03     | 0.00                                    | 0.09     | 0.29     | 0.02     | 0.21     | 0.08     | 0.08     | 0.36     | 0.31     | 0.30      | 0.14   |
|                         |        | 625,000                                  | -0.07    | -0.07    | -0.07    | -0.07    | -0.04    | -0.04    | -0.04    | -0.03    | -0.03     | 0.00                                    | -0.03    | -0.05    | -0.04    | -0.02    | -0.02    | -0.03    | 0.02     | 0.06     | 0.00      | 0.03   |
|                         |        | 3,125,000                                | -0.07    | -0.07    | -0.06    | -0.04    | 0.00     | -0.04    | -0.04    | -0.04    | -0.04     | -0.01                                   | -0.06    | -0.03    | -0.06    | -0.02    | -0.03    | -0.06    | -0.05    | -0.03    | -0.01     | -0.03  |
| 15,625,000              | -0.06  | -0.06                                    | -0.05    | -0.03    | -0.03    | -0.03    | -0.04    | -0.03    | -0.02    | 0.01     | -0.05     | -0.03                                   | -0.02    | -0.02    | 0.00     | -0.06    | -0.05    | -0.03    | 0.01     | 0.00     |           |        |
|                         |        | GP2207 (Protein-base ConC immunized)     |          |          |          |          |          |          |          |          |           | GP2208 (Glycan-base ConC immunized)     |          |          |          |          |          |          |          |          |           |        |
| Dilution factor         |        | GP2207-1                                 | GP2207-2 | GP2207-3 | GP2207-4 | GP2207-5 | GP2207-6 | GP2207-7 | GP2207-8 | GP2207-9 | GP2207-10 | GP2208-1                                | GP2208-2 | GP2208-3 | GP2208-4 | GP2208-5 | GP2208-6 | GP2208-7 | GP2208-8 | GP2208-9 | GP2208-10 |        |
| anti-Protein base ConC  | Week 6 | 1,000                                    | 2.021    | 2.758    | 2.634    | 2.465    | 2.754    | 2.513    | 2.753    | 2.974    | 3.089     | 3.160                                   | -0.015   | -0.132   | -0.082   | -0.120   | -0.069   | -0.030   | -0.056   | -0.076   | 0.022     | -0.087 |
|                         |        | 5,000                                    | 1.944    | 2.355    | 1.503    | 1.582    | 2.336    | 2.358    | 2.406    | 3.067    | 2.302     | 2.767                                   | -0.103   | -0.158   | -0.123   | -0.132   | -0.118   | -0.097   | -0.100   | -0.087   | -0.093    | -0.108 |
|                         |        | 25,000                                   | 1.073    | 1.744    | 0.839    | 0.486    | 1.561    | 1.000    | 1.501    | 2.683    | 0.943     | 1.260                                   | -0.144   | -0.166   | -0.123   | -0.163   | -0.164   | -0.108   | -0.074   | -0.085   | -0.093    | -0.066 |
|                         |        | 125,000                                  | 0.291    | 0.547    | 0.166    | 0.047    | 0.480    | 0.290    | 0.429    | 1.303    | 0.246     | 0.442                                   | -0.134   | -0.148   | -0.141   | -0.169   | -0.143   | -0.122   | -0.127   | -0.125   | -0.119    | -0.126 |
|                         |        | 625,000                                  | 0.050    | 0.117    | -0.019   | -0.041   | 0.065    | 0.079    | 0.106    | 0.376    | 0.050     | 0.104                                   | -0.143   | -0.160   | -0.141   | -0.144   | -0.129   | -0.123   | -0.125   | -0.122   | -0.122    | -0.125 |
|                         |        | 3,125,000                                | -0.020   | -0.027   | -0.057   | -0.062   | -0.003   | 0.030    | 0.057    | 0.110    | 0.007     | 0.020                                   | -0.156   | -0.158   | -0.159   | -0.170   | -0.156   | -0.121   | -0.129   | -0.127   | -0.131    | -0.131 |
| 15,625,000              | -0.037 | -0.054                                   | -0.066   | -0.067   | -0.064   | 0.017    | 0.001    | 0.016    | -0.004   | -0.002   | -0.150    | -0.167                                  | -0.152   | -0.132   | -0.158   | -0.118   | -0.125   | -0.113   | -0.126   | -0.129   |           |        |
| anti-Glycan base ConC   | Week 6 | 1,000                                    | 0.019    | -0.044   | -0.029   | -0.044   | -0.041   | 0.027    | 0.040    | 0.008    | 0.073     | 0.021                                   | 2.285    | 1.935    | 2.114    | 1.574    | 1.546    | 1.624    | 1.692    | 1.379    | 1.974     | 1.137  |
|                         |        | 5,000                                    | -0.055   | -0.070   | -0.067   | -0.064   | -0.067   | -0.003   | 0.005    | -0.008   | 0.007     | -0.004                                  | 1.096    | 1.089    | 1.233    | 0.560    | 0.898    | 0.629    | 0.866    | 0.402    | 0.908     | 0.642  |
|                         |        | 25,000                                   | -0.069   | -0.071   | -0.069   | -0.065   | -0.052   | -0.008   | -0.008   | -0.008   | -0.007    | -0.007                                  | 0.260    | 0.363    | 0.411    | -0.069   | 0.271    | 0.158    | 0.238    | 0.074    | 0.241     | 0.139  |
|                         |        | 125,000                                  | -0.060   | -0.072   | -0.070   | -0.070   | -0.070   | -0.      |          |          |           |                                         |          |          |          |          |          |          |          |          |           |        |

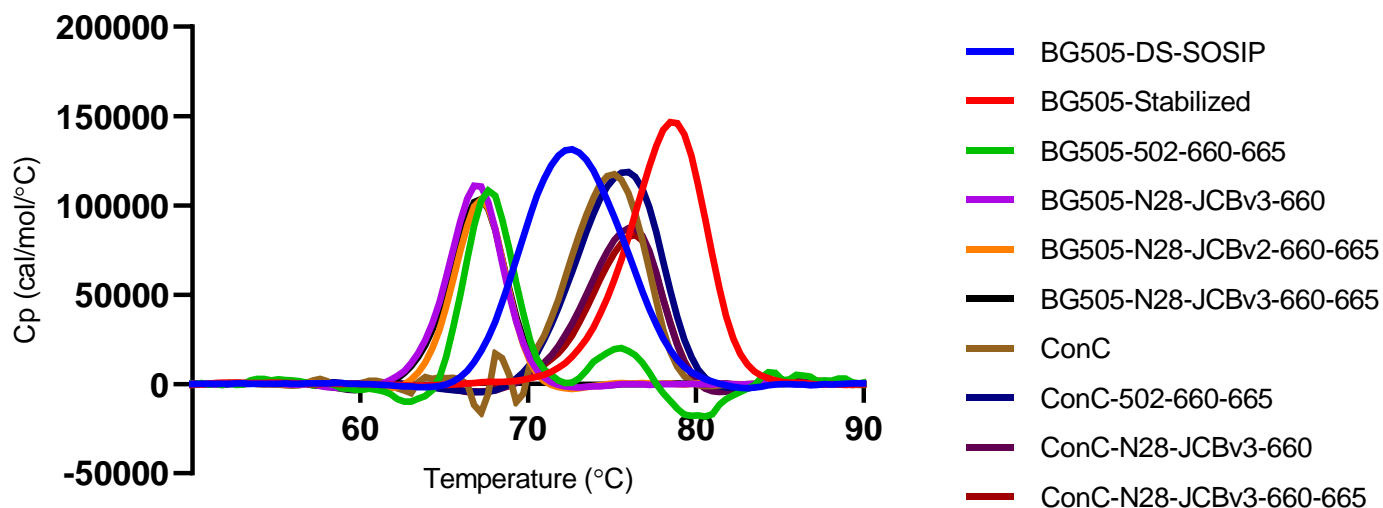

| Constructs              | Melting Temperature (°C) |
|-------------------------|--------------------------|
| BG505-DS-SOSIP          | 72.6                     |
| BG505-Stabilized        | 78.5                     |
| BG505-502-660-665       | 67.7                     |
| BG505-N28-JCBv3-660     | 66.9                     |
| BG505-N28-JCBv2-660-665 | 67.3                     |
| BG505-N28-JCBv3-660-665 | 67.3                     |
| ConC                    | 75.2                     |
| ConC-502-660-665        | 76.0                     |
| ConC-N28-JCBv3-660      | 76.0                     |
| ConC-N28-JCBv3-660-665  | 76.5                     |

**Figure S1. Differential Scanning Calorimetry for top BG505 and ConC base-covered variants, related to Figure 2.** DSC scans of glycan-base candidates for BG505 and ConC as compared to the protein-base templates, with calculated melting temperature ( $T_m$ ) for each construct.

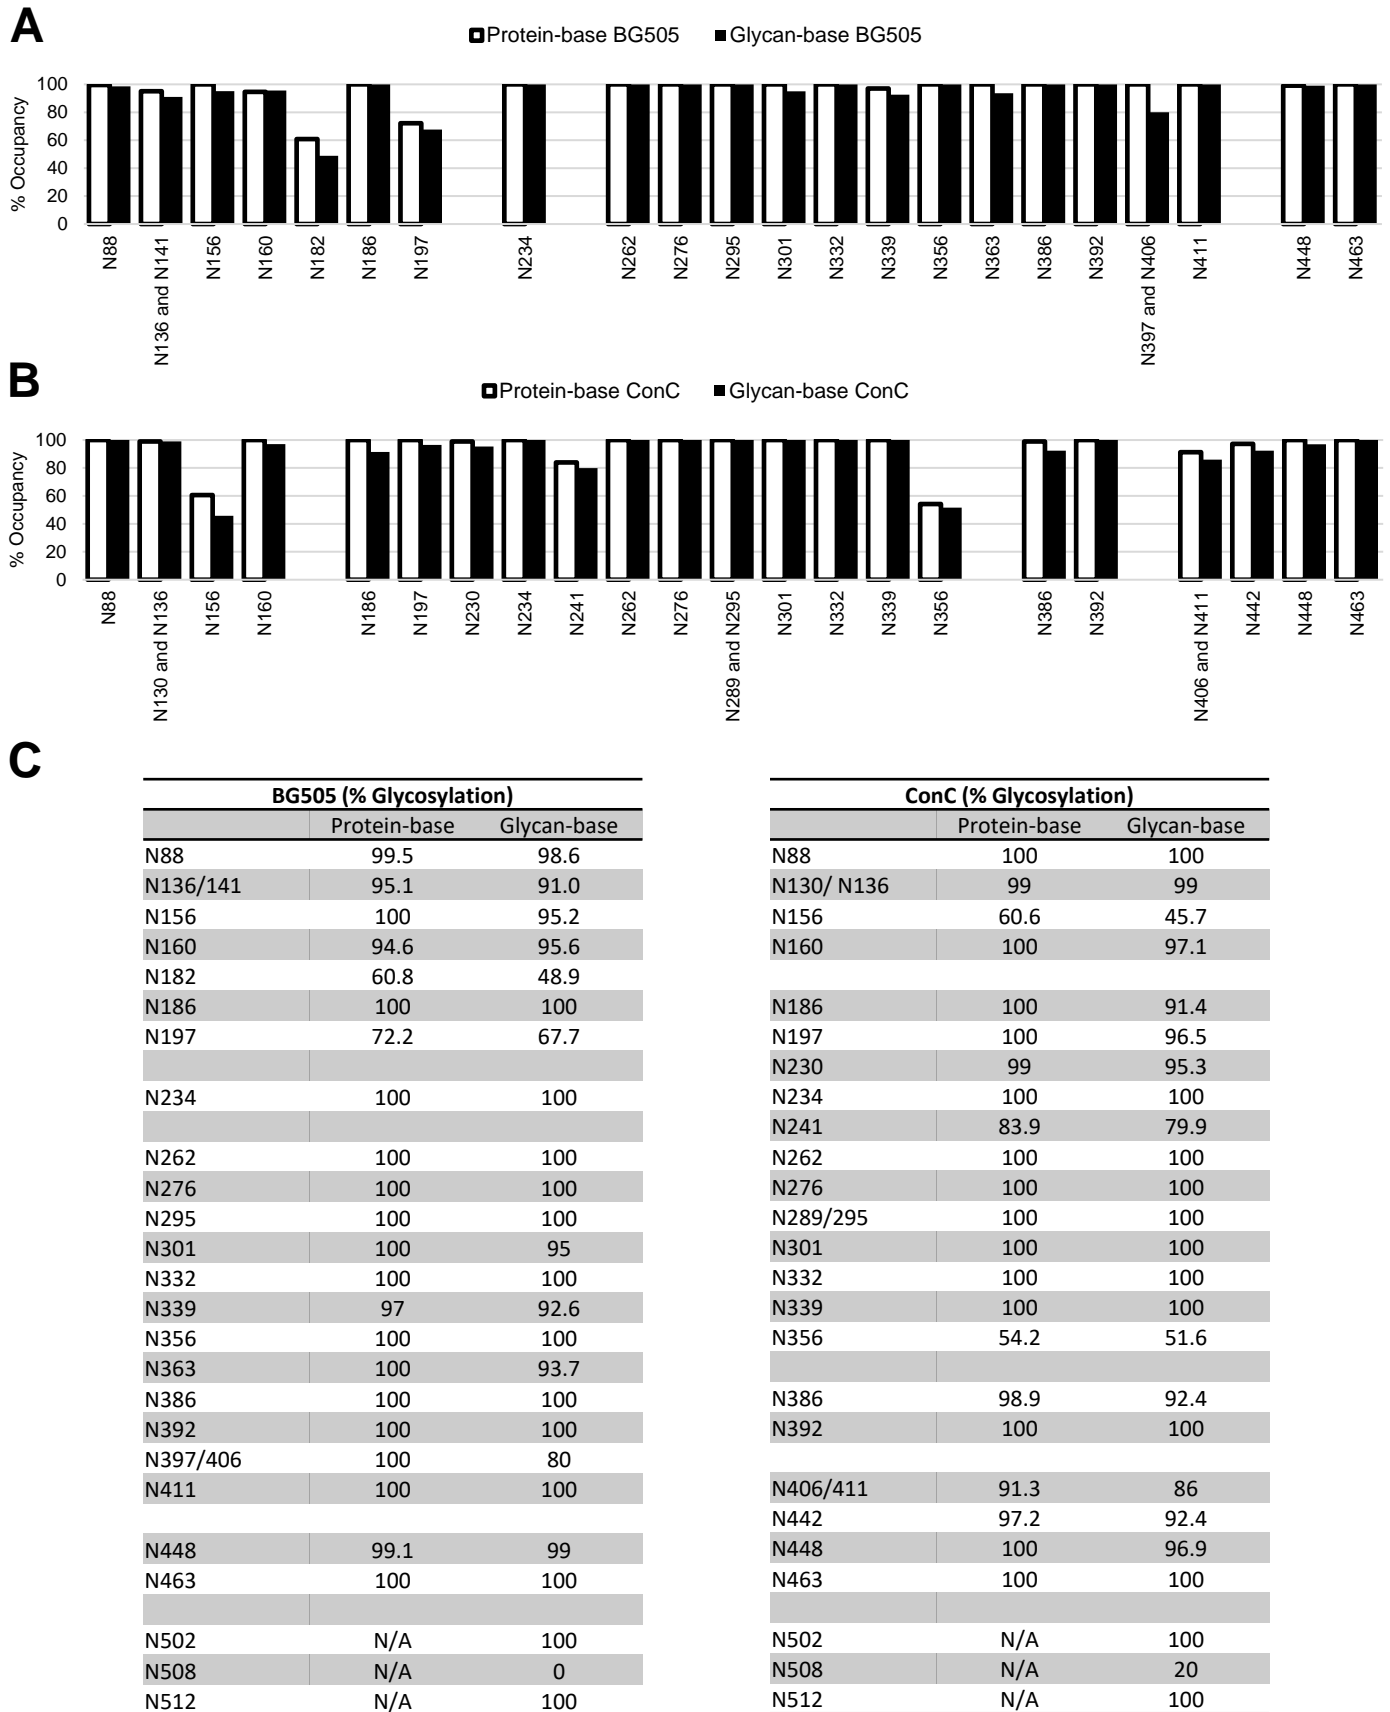

**Figure S2. Glycan analysis of gp120 of protein-base and glycan-base trimers, related to Figure 3.** (A) Percent glycan occupancy at each glycosylation site in gp120 of either protein-base or glycan base BG505 or (B) ConC. (C) Occupancy values at each site.

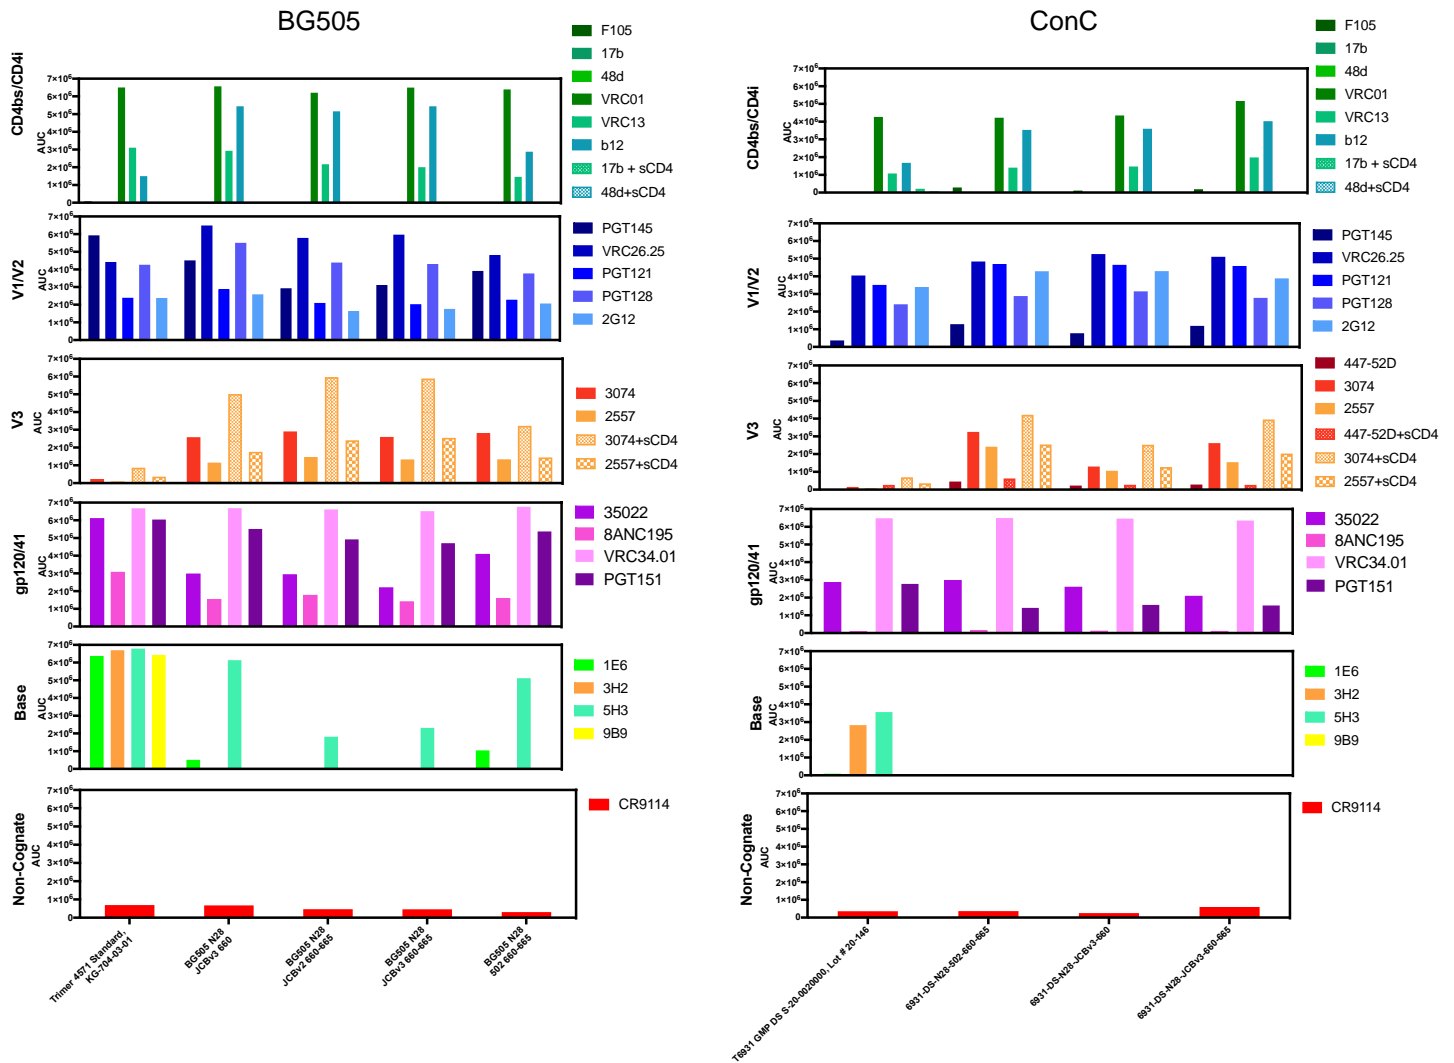

**Figure S3. MSD for top BG505 and ConC base-covered variants, related to Figure 3.** MSD antigenicity analysis of glycan-base candidates for BG505 and ConC. In both cases, glycan-base constructs show similar binding to antibody panel as the protein-base counterpart, with the exception of slightly high V3 reactivity in most cases.



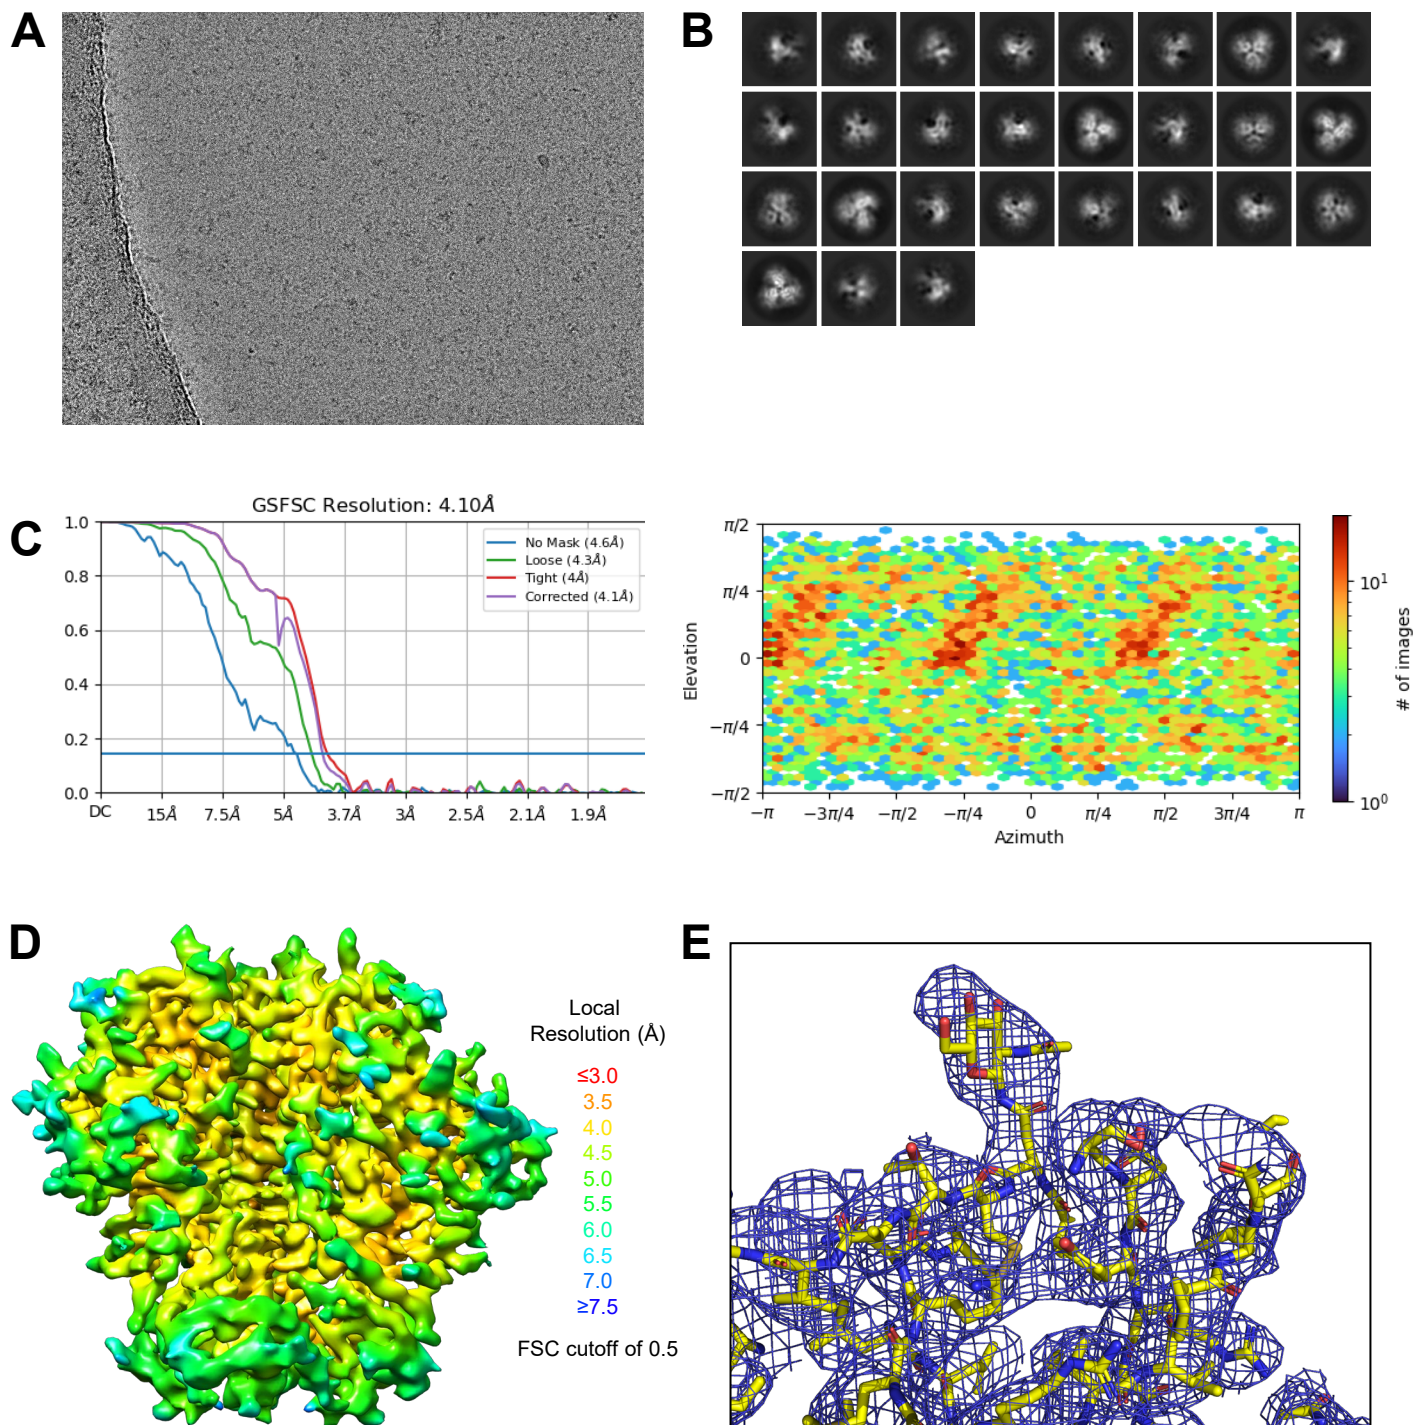

**Figure S4. Cryo-EM details of Glycan-base ConC, related to Figure 4.** (A) Representative micrograph. (B) Representative 2D class averages. (C) The gold-standard Fourier shell correlation resulted in a resolution of 3.39 Å for the overall map using non-uniform refinement with C3 symmetry (left panel); the orientations of all particles used in the final refinement are shown as a heatmap (right panel). (D) Local resolution of the final reconstruction, shown by color coding from red to blue for high to low resolution. (E) Representative map after sharpening and improvement in Resolve. Map is contoured at  $2\sigma$ .

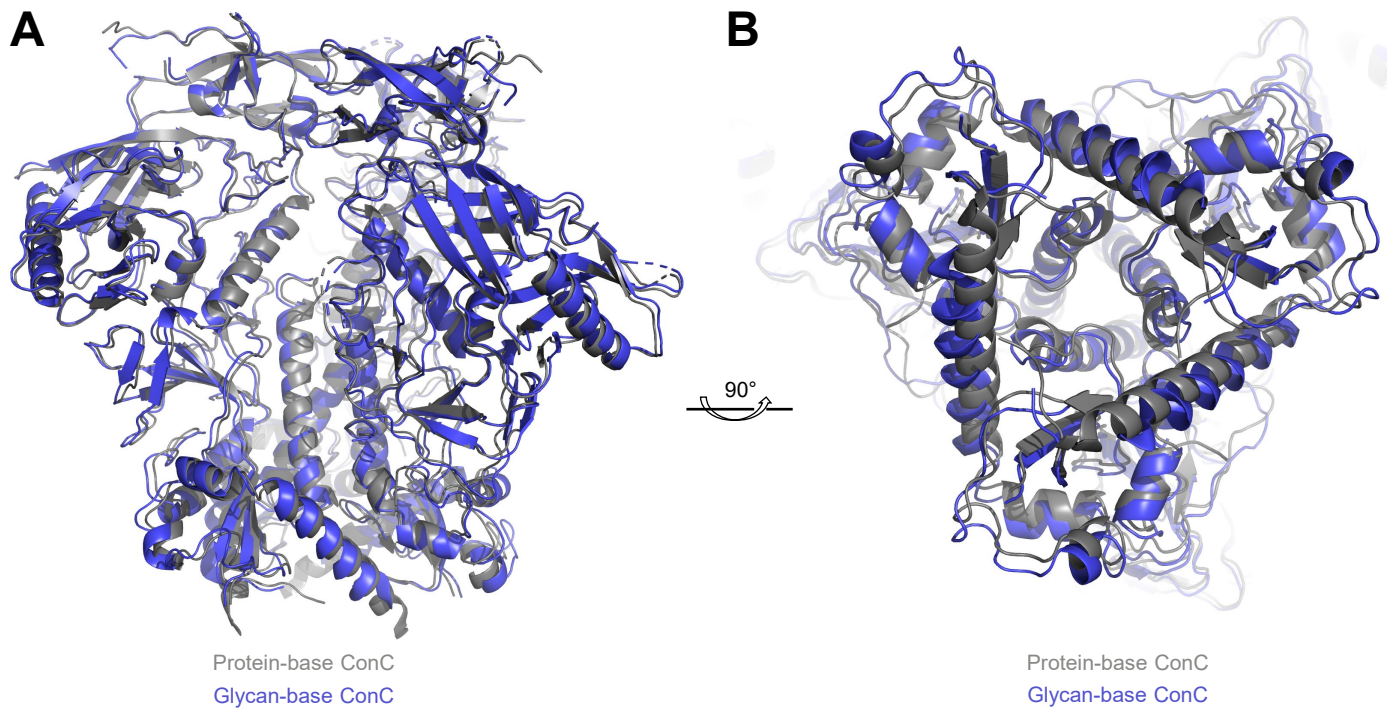

**Figure S5. Superposition of protein-base ConC structure onto glycan-base ConC, related to Figure 4.** (A) Structural superposition of published protein-base ConC structure (PDB 6CK9) in grey with the glycan-base ConC structure in blue. (B) Bottom view of the superposition showing the movement at the base of the trimer.

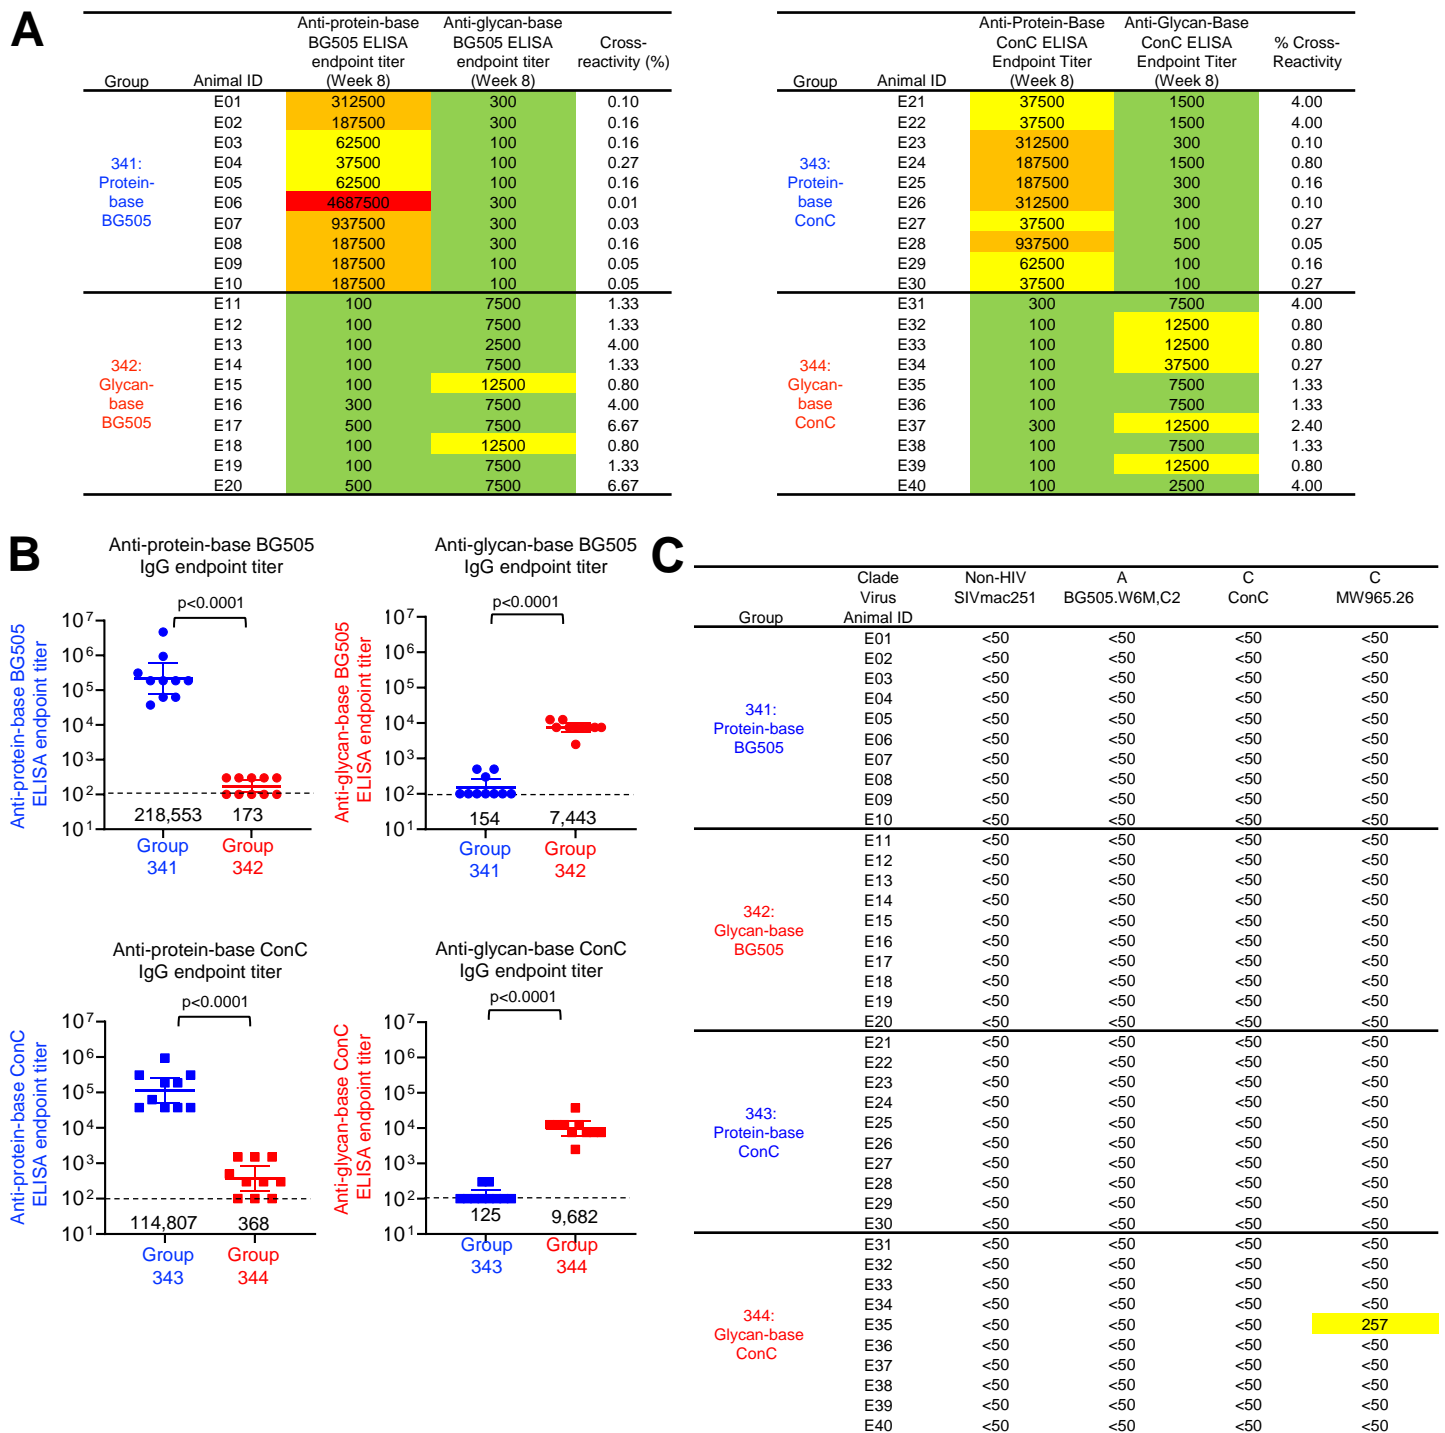

**Figure S6. ELISA endpoint titers and serum neutralization ( $ID_{50}$ ) titers elicited at Week 8 for BG505 or ConC trimer-immunized mice, related to Figure 5. (A) Week 8 ELISA endpoint titers using a starting dilution of 1:100 and cross-reactivity (%) of responses are listed for each animal (B) Group comparison shown for week 8 ELISA endpoint titers against protein-base and glycan-base variants of BG505 trimer (left) and ConC trimer (right) (C) Week 8 neutralization ( $ID_{50}$ ) titers against wildtype BG505, ConC, MW965.26, and SIVmac251 strains.**
